# Supplementary material
Source: HighWire-hosted journal article supplement (http://www.bmj.com/highwire/filestream/441076/field_highwire_adjunct_files/0)
Supplement: 0 [file 0]

## Figures from the 27th British Social Attitudes (BSA) survey

Fig A: Satisfaction with the way the NHS is run (Very + quite satisfied)

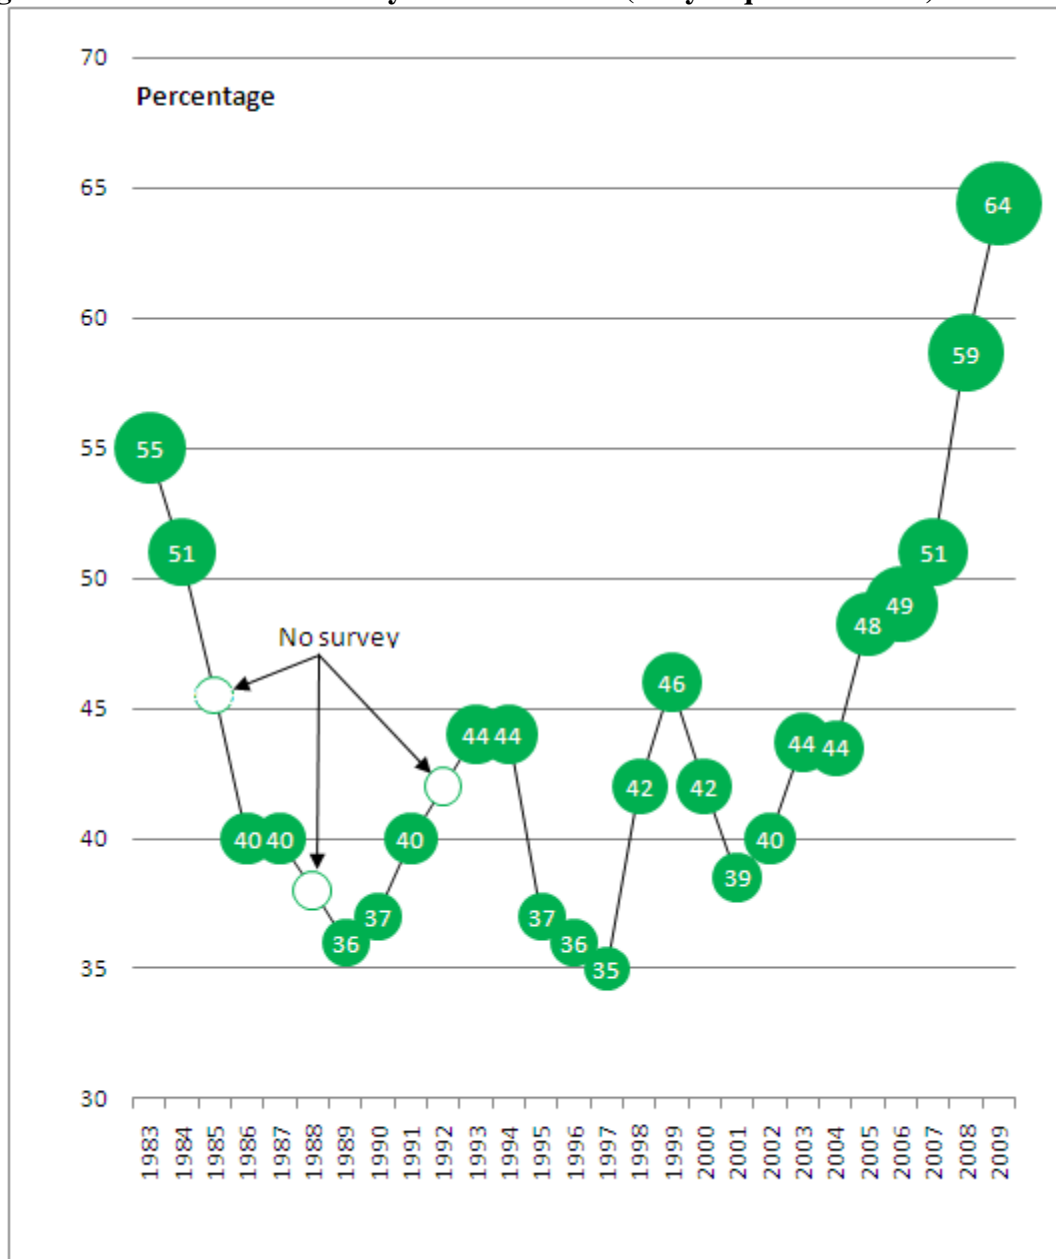

Question asked: "All in all, how satisfied or dissatisfied would you say you are with the way in which the National Health Service is run nowadays?"

Source: Appleby and Robinson (2010)

**Fig B: Satisfaction with GPs, Dentists, inpatients, outpatients, and accident and emergency services (Very + quite satisfied)**

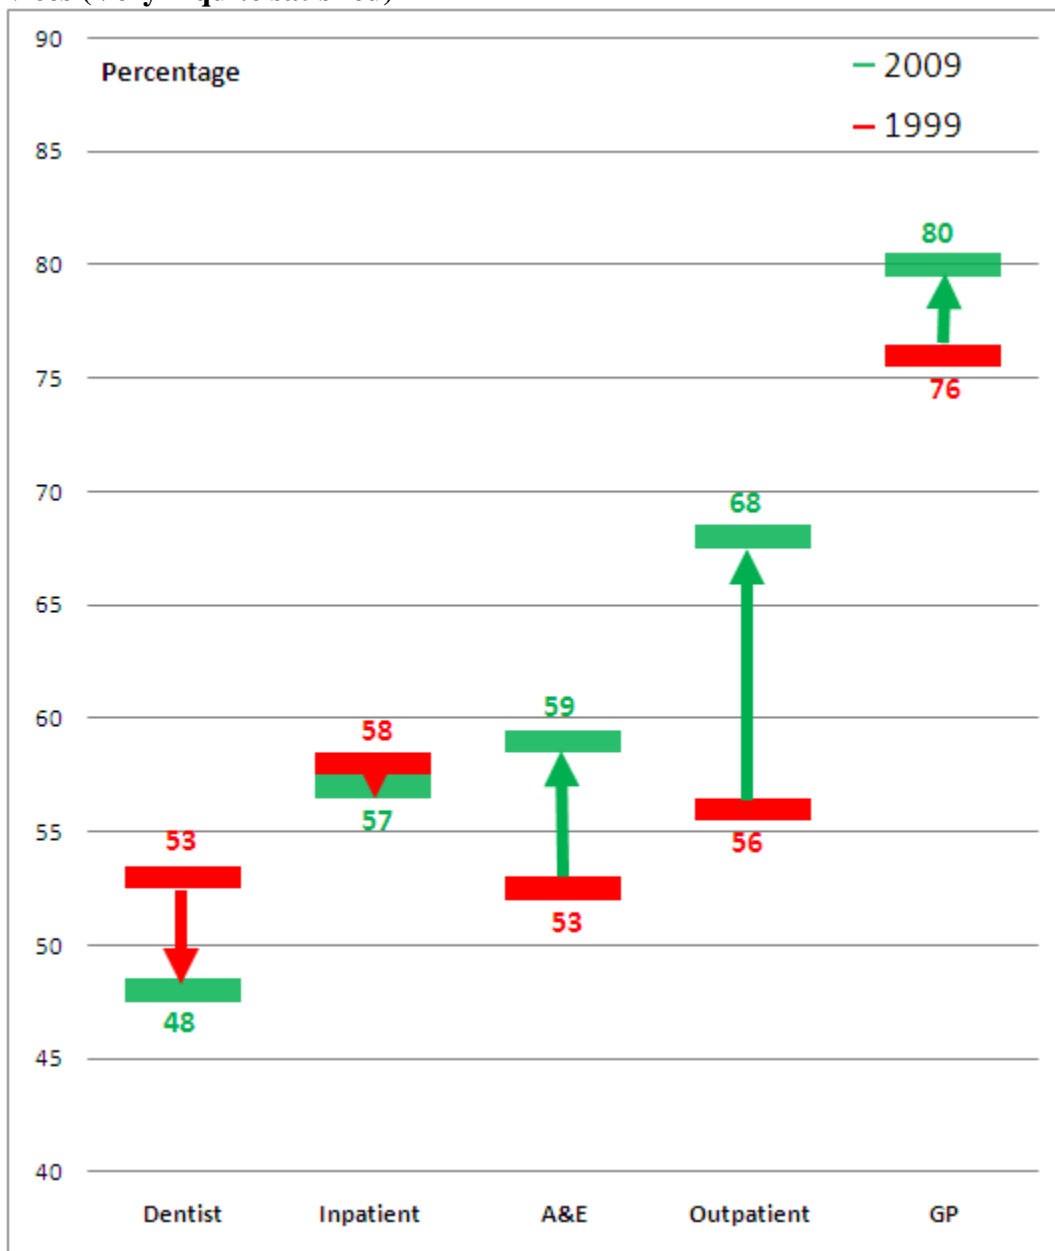

Question asked: “From your own experience, or from what you have heard, please say how satisfied or dissatisfied you are with the way in which each of these parts of the National Health Service runs nowadays: ... local doctors or GPs?... National Health Service dentists?... being in hospital as an inpatient?... attending hospital as an outpatient?... Accident and Emergency departments?”

Source: Appleby and Robinson (2010)

**Fig C: Satisfaction with the way the NHS is run (Very + quite satisfied) by political identification**

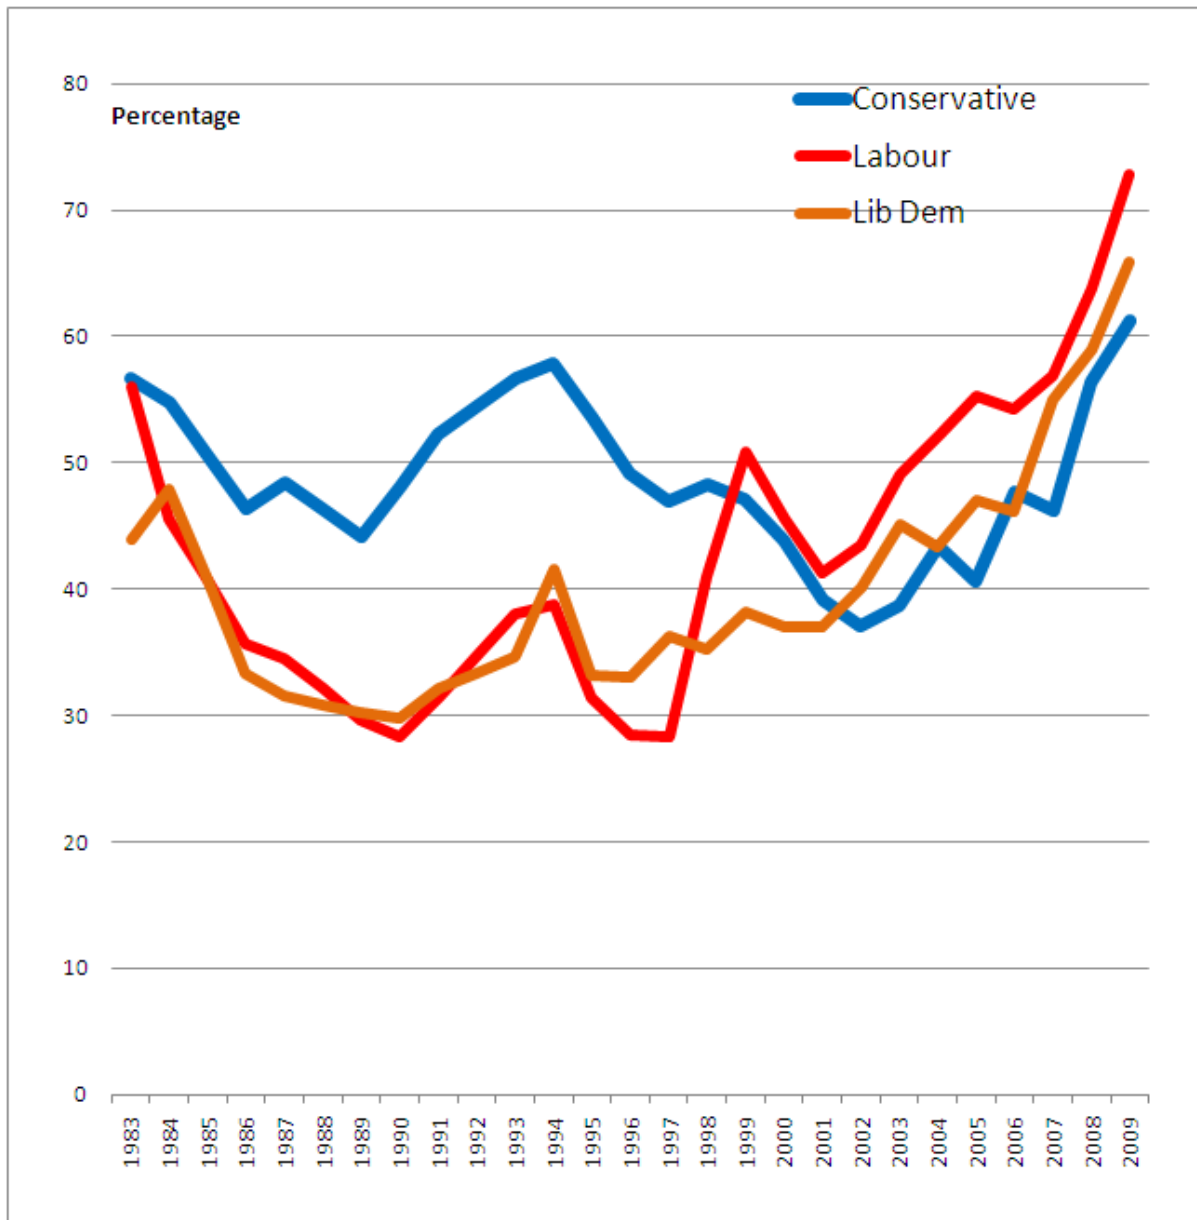

Question asked: “All in all, how satisfied or dissatisfied would you say you are with the way in which the National Health Service is run nowadays?” (Note: no surveys in 1985, 1988 and 1992; data for these years based on an average of years either side)

Source: Appleby and Robinson (2010)

**Fig D: The most important issues facing Britain today**

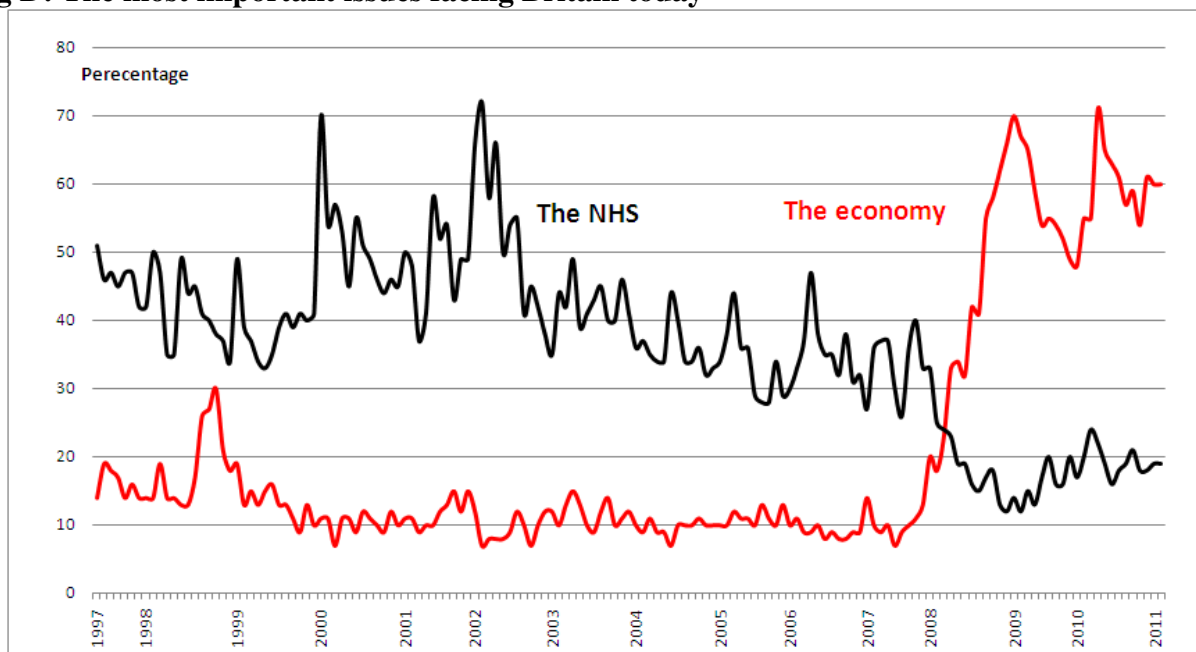

Question asked: “What would you say is the most important issue facing Britain today?” + “What do you see as other important issues facing Britain today?” (Unprompted - combined answers)

Source: Ipsos-Mori (2011)

### References

Appleby J, Robertson R. A healthy improvement? Satisfaction with the NHS under Labour. In: Park A, Phillips M, Clery E, Curtice J, eds. *British Social Attitudes Survey 2010-2011: Exploring Labour's legacy—the 27th report*. Sage, 2010.

Ipsos-Mori. Issues index: trends since 1997. The most important issues facing Britain today. 2011. [www.ipsos-mori.com/researchpublications/researcharchive/poll.aspx?oItemID=56&view=wide](http://www.ipsos-mori.com/researchpublications/researcharchive/poll.aspx?oItemID=56&view=wide)
